# Supplementary material for: Treatment of traumatised refugees with basic body awareness therapy versus mixed physical activity as add-on treatment: Study protocol of a randomised controlled trial
Source: PubMed Central journal article supplement (PMC4619210; doi:10.1186/s13063-015-0974-9), 2015-10-22
Supplement: 13063_2015_974_MOESM2_ESM.pdf [file 13063_2015_974_MOESM2_ESM.pdf]

**Table 2: Protocol version and amendments – Date and version identifier.**

|                                                                |                                                                                                                                                                                                                                                                                                                                                                                                                                                                               |
|----------------------------------------------------------------|-------------------------------------------------------------------------------------------------------------------------------------------------------------------------------------------------------------------------------------------------------------------------------------------------------------------------------------------------------------------------------------------------------------------------------------------------------------------------------|
| <b>Issue date:</b> 2013-July-12<br><b>Authors:</b> MN; JC; ELM | Original protocol version.                                                                                                                                                                                                                                                                                                                                                                                                                                                    |
| <b>Issue date:</b> 2015-04-24<br><b>Authors:</b> MN; JC; ELM   | Amendment 06: Because of preliminary analysis showing a higher dropout rate than expected, the number of planned included patients is raised from 250 to 288. Therefore the trial is also extended until July 2016.                                                                                                                                                                                                                                                           |
| <b>Issue date:</b> 2015-08-11<br><b>Authors:</b> MN; JC; ELM   | Amendment 07: Cf. amendment 06, a higher number is being included. Because of fewer patients belonging to one specific stratification group (men with a HTQ score>3.2) were included in the trial, the inclusion period is extended until September 2015 and the number of maximal included patients is raised to 340. This ensures a big enough number of the mentioned stratification group being included, in order later to be able to make statistically sound analysis. |
