# Supplementary material for: Treatment of traumatised refugees with basic body awareness therapy versus mixed physical activity as add-on treatment: Study protocol of a randomised controlled trial
Source: PubMed Central journal article supplement (PMC4619210; doi:10.1186/s13063-015-0974-9), 2015-10-22
Supplement: 13063_2015_974_MOESM4_ESM.pdf [file 13063_2015_974_MOESM4_ESM.pdf]

**Table 4: WHO Trial Registration Data Set**

| <b>Data category</b>                          | <b>Information</b>                                                                                                                                                                                                                                                                             |
|-----------------------------------------------|------------------------------------------------------------------------------------------------------------------------------------------------------------------------------------------------------------------------------------------------------------------------------------------------|
| Primary registry and trial identifying number | ClinicalTrials.gov NCT01955538                                                                                                                                                                                                                                                                 |
| Date of registration in primary registry      | 18 September 2013                                                                                                                                                                                                                                                                              |
| Secondary identifying numbers                 | H-3-2013-080, PTF4                                                                                                                                                                                                                                                                             |
| Source(s) of monetary or material support     | TrygFonden, Denmark.                                                                                                                                                                                                                                                                           |
| Primary sponsor                               | Jessica Carlsson, Competence Centre for Transcultural Psychiatry, Mental Health Services in the Capital Region, Denmark.                                                                                                                                                                       |
| Secondary sponsor(s)                          |                                                                                                                                                                                                                                                                                                |
| Contact for public queries                    | <i>MN</i> , MD, <a href="mailto:maja.nordbrandt@regionh.dk">maja.nordbrandt@regionh.dk</a> , +45 20158373                                                                                                                                                                                      |
| Contact for scientific queries                | <i>MN</i> , MD, Competence Centre for Transcultural Psychiatry, Mental Health Services in the Capital Region, Denmark.                                                                                                                                                                         |
| Public title                                  | Treatment of traumatised refugees: the effect of Basic Body Awareness Therapy versus mixed physical activity as add-on treatment. A randomised controlled trial.                                                                                                                               |
| Scientific title                              | Treatment of traumatised refugees: the effect of Basic Body Awareness Therapy versus mixed physical activity as add-on treatment. A randomised controlled trial.                                                                                                                               |
| Countries of recruitment                      | Denmark                                                                                                                                                                                                                                                                                        |
| Health condition(s) or problem(s) studied     | Post Traumatic Stress Disorders, Depression and Chronic pain                                                                                                                                                                                                                                   |
| Intervention(s)                               | Active comparators: Treatment as usual (control group).<br>Experimental: Basic Body Awareness Therapy as add on treatment to Treatment as usual.<br>Experimental: Mixed Physical Activity as add on treatment to Treatment as usual.                                                           |
| Key inclusion and exclusion criteria          | Inclusion criteria: Patients must be referred to treatment for PTSD at CTP from September 2013 to September 2015; age 18 or older; must be refugees or persons who have been family reunified with a refugee; have PTSD according to the ICD-10 research criteria; psychological trauma in the |

|                         |                                                                                                                                                                                                                                                                                                                                                                                                                                                                                                                             |
|-------------------------|-----------------------------------------------------------------------------------------------------------------------------------------------------------------------------------------------------------------------------------------------------------------------------------------------------------------------------------------------------------------------------------------------------------------------------------------------------------------------------------------------------------------------------|
|                         | <p>anamnesis; assessed by a doctor to be motivated for treatment; provide written informed consent.</p> <p>Exclusion criteria: severe psychotic disorder (defined as patients with an ICD-10 diagnosis F2x and F30.1-F30.9); are current abusers of drugs or alcohol (F1x.24-F1x.26); have physical handicaps that unable participation in the physical activities; have cardiac arrhythmia identified on the electrocardiogram taken before start of the treatment or symptoms of heart problems that are unclarified.</p> |
| Study type              | <p>Interventional</p> <p>Allocation: randomized</p> <p>Intervention model: parallel assignment</p> <p>Masking: not blinded apart from one secondary outcome (HAM-A+B)</p> <p>Primary purpose: treatment</p>                                                                                                                                                                                                                                                                                                                 |
| Date of first enrolment | September 2013                                                                                                                                                                                                                                                                                                                                                                                                                                                                                                              |
| Target sample size      | 310                                                                                                                                                                                                                                                                                                                                                                                                                                                                                                                         |
| Recruitment status      | Recruiting                                                                                                                                                                                                                                                                                                                                                                                                                                                                                                                  |
| Primary outcome(s)      | Change in Harvard Trauma Questionnaire (HTQ)                                                                                                                                                                                                                                                                                                                                                                                                                                                                                |
| Key secondary outcomes  | <p>Change in Hopkins Symptom Check List (HSCL-25)</p> <p>Change in Hamilton depression + anxiety (HAM D+A)</p> <p>Change in World Health Organisation-5 (WHO5)</p> <p>Change in Sheehan Disability Scale</p> <p>Change in Visual Analogue Scale (VAS)</p> <p>Change in Brief Pain Inventory Short Form (BPI)</p> <p>Change in Multidimensional Assessment of Interoceptive Awareness (MAIA)</p> <p>Change in Global assessment of function (GAF)</p>                                                                        |
